# Supplementary material
Source: PubMed Central journal article supplement (PMC6430669)
Supplement: NIHMS1517150-supplement-1.pdf [file NIHMS1517150-supplement-1.pdf]

## **SUPPLEMENTARY INFORMATION**

**Non-specific degradation of transcripts promotes plasmid clearance during type III-A CRISPR-Cas immunity.**

Jakob T. Rostøl and Luciano Marraffini

## Supplementary figures and legends

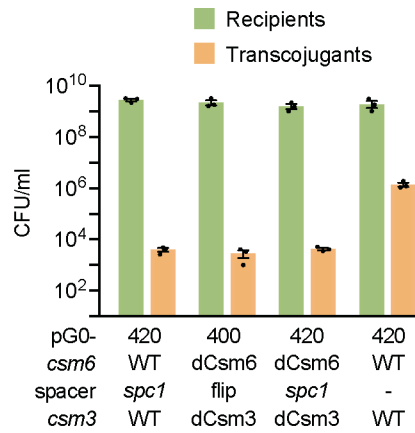

**Figure S1 – Csm3 RNase activity is not required for interference against a well-transcribed target in pG0400/pG0420.** Like Fig. 1c, but with catalytic Csm3 mutants (dCsm3) where indicated. With well-transcribed targets, neither the RNase activity of Csm3 nor Csm6 is required for interference. Each bar represents the mean of three biological replicates  $\pm$ s.e.m.

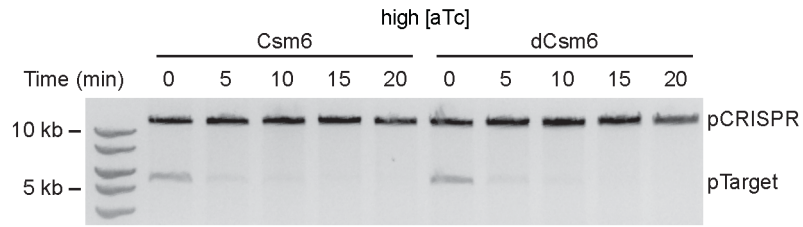

**Figure S2 – Plasmid degradation is rapid for both WT and dCsm6 under high transcription conditions.** Same as Figure 2c, but assaying earlier timepoints after induction of transcription. Gel image is representative of two independent experiments.

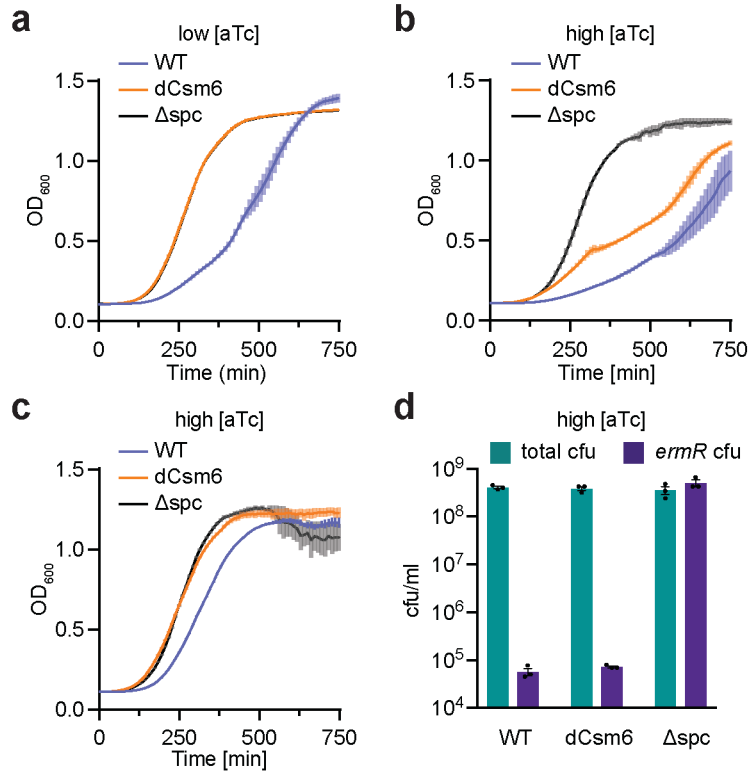

**Figure S3 – Csm6 is required for pTarget clearance.** **a**, The OD<sub>600</sub> of staphylococci harbouring pTarget and the specified pCRISPR is measured every 10 minutes after induction of protospacer transcription by the addition of low levels of aTc, in the presence of erythromycin. Each data point represents the mean of three biological replicates ±s.e.m. **b**, Same as panel **a**, but with high levels of aTc. **c**, Same as panel **b**, but without erythromycin. For the Δ*spc* control curve, the same data as from Fig. 5a was used. **d**, Cells at the end of the experiment in panel **c** are spotted onto TSB plates in the presence or absence of erythromycin, selecting for the presence of pTarget, and enumerated. Each bar represents the mean of three replicates ±s.e.m.

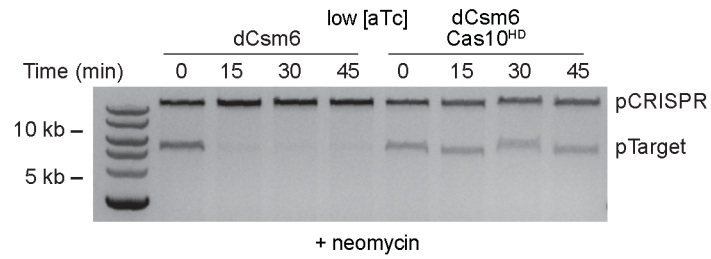

**Figure S4 – The Cas10 HD domain is required for plasmid depletion in the presence of neomycin.** Same as Fig. 4c, but testing cells that express both Cas10<sup>HD</sup> and dCsm6, where pTarget is not depleted. The experiment was performed once.

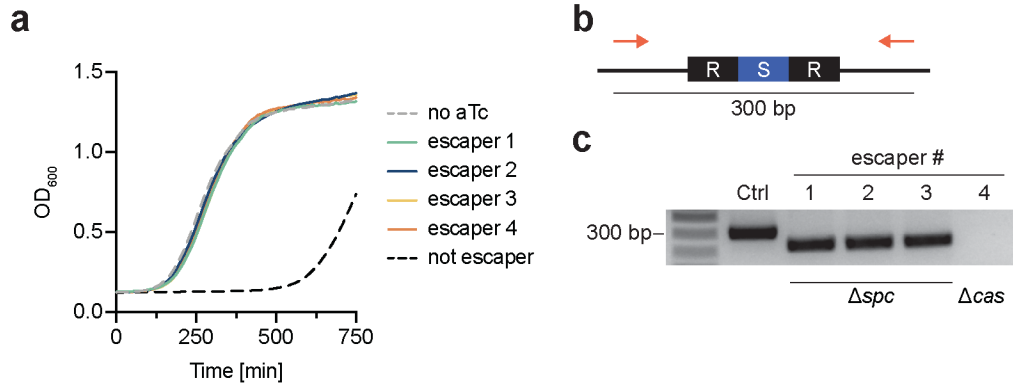

**Figure S5 – Analysis of staphylococci expressing Cas10<sup>HD</sup> in the presence of a target transcript (high aTc).** **a**, Cells that recovered at the end of the experiment in shown in Figure 5a (expressing the Cas10<sup>HD</sup> mutant) were streaked out to obtain single colonies. Four colonies were picked and seeded into a new microwell plate where growth was tracked by measuring the OD<sub>600</sub> every 10 minutes in the presence of high levels of aTc. The four isolates displayed unrestricted growth, similar to a control culture lacking aTc induction of CRISPR immunity. A culture that had previously not grown in the presence of aTc (non-escaper) is shown as a targeting control. **b**, All four escapers were analysed by PCR using primers that include the CRISPR locus, and Sanger sequencing to determine the presence of escaper mutations. A 300 bp PCR amplicon spanning the pTarget-specific spacer (S) and its two flanking repeats (R) is expected from wild-type loci. **c**, Agarose gel electrophoresis of the PCR products from the amplification illustrated in panel **b**. Gel image is representative of two independent experiments. A wild-type locus was used a control (ctrl). Escapers 1 through 3 contained a reduced CRISPR array. Sanger sequencing revealed that they carry a deletion of the spacer and a one of the flanking repeats (Δ*spc*). Escaper 4 did not produce a PCR product. Sanger sequencing of plasmid DNA isolated from this escaper showed that it harboured a complete deletion (~9kb) of the *cas* operon (Δ*cas*). All these deletions render pCRISPR unable to target pTarget, and therefore allow to escape the Csm6-mediated growth arrest.

**a**

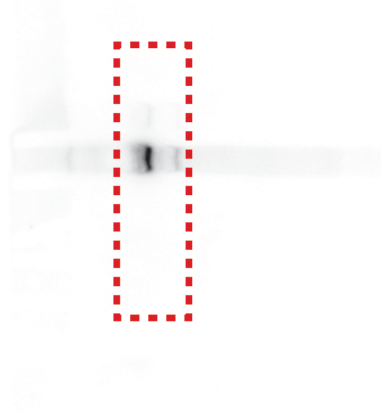

**b**

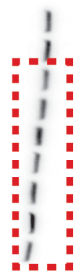

**c**

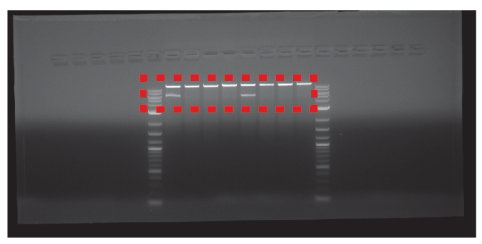

**d**

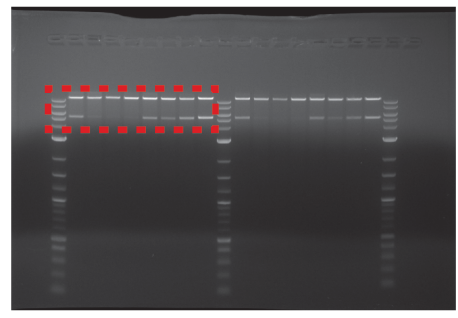

**e**

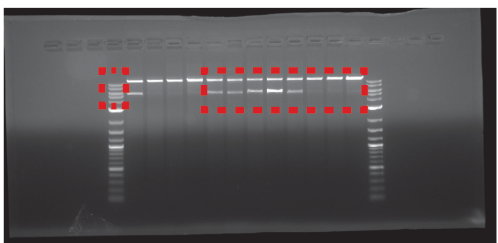

**f**

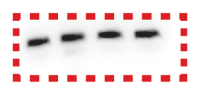

**g**

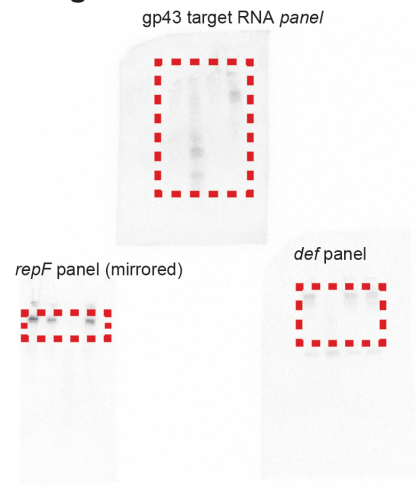

**h**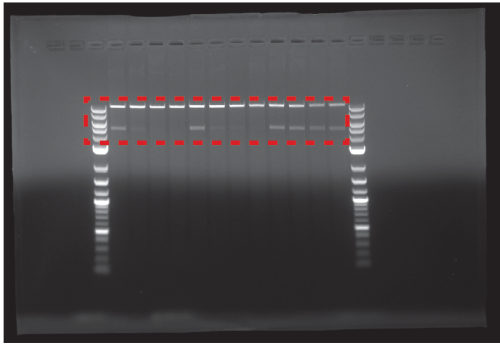**i**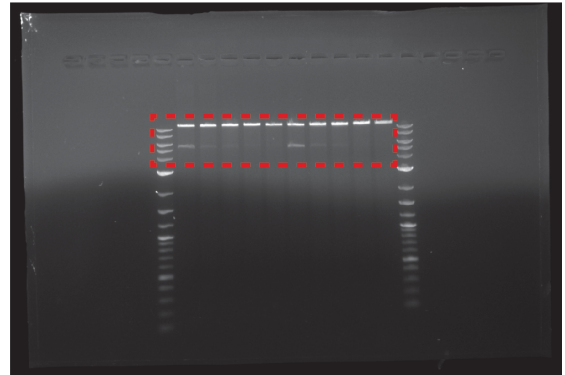**j**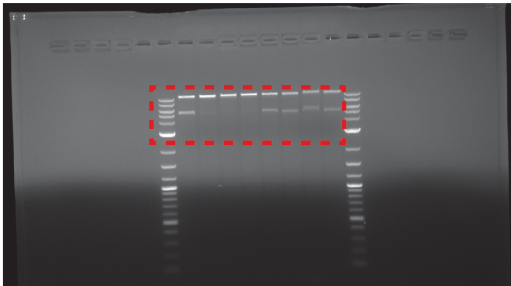**k**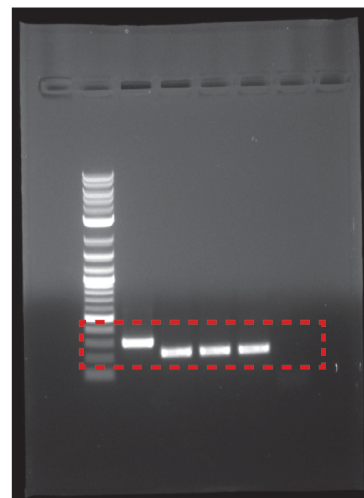

**Fig S6 – Original images for data used in this study.** **a** Image used for gp43 target RNA panel of Fig. 2b. The image was rotated 90 degrees clockwise and mirrored. **b** Image used for 5S rRNA panel of Fig. 2b. The image was rotated 90 degrees and mirrored. **c.** Image used for Fig. 2c. **d** Image used for Fig. 2d. The samples in the right part of the image represent a different aTc concentration. **e** Image used for Fig. 2e. **f** Image used for 5S rRNA panel of Fig. 3c. **g** Image used for gp43 target RNA, *repF*, and *def* panels of 3c. The top of *repF* cropped out represents RNA that did not enter the gel **h** Image used for Fig. 4c. **i** Image used for Fig. S2. **j** image used for Fig. S4. **k** image used for Fig S5c.



## Supplementary tables

### Supplementary table S1. Oligonucleotides used in this study.

| Name   | Sequence                                                     |
|--------|--------------------------------------------------------------|
| AV552  | tcgagtcagaaaaatacctgtatct                                    |
| AV553  | cctagaccatgggtatggacagatc                                    |
| GG12   | gttctcgtcccctttctcgggggtgggtatcgatcctttgtactgatgattatatacttc |
| GG58   | gaagaaaaggggacgagaactaaatctaacaacactctaaaaaattg              |
| GG424  | catattgcctgatgaagtgaatag                                     |
| GG425  | ctattcacttcatcaggcaatag                                      |
| JTR390 | atgcggccgctgacatatcatataatctgtactagtgattgtc                  |
| JTR405 | gaacctttgtactgatgattatatacttcggcatacgt                       |
| JTR406 | gatcacgtatgccgaagtataaatcatcagtacaaag                        |
| JTR592 | ttttgtgttgcggtcctattctcccgactttggtacc                        |
| JTR595 | gcgggaaccaatcatcaaatttaaacttcattgcataatc                     |
| JTR601 | caacattatcatcgacactaaggcaaccttcaccagttgg                     |
| JTR606 | gtgttcggcatgggaacaggtgtgacctcc                               |
| PS465  | gaatctagtagattggagcaattgcttctcctgtagtagagattgcaaacc          |
| PS466  | ggtttgcaaactcttaactacaggagaagcaattgctccaatcatactagattc       |
| W614   | ggtataactaaaagtcgtttgttg                                     |
| W852   | ccaacaaacgacttttagtataacc                                    |
| W1022  | aataacatcttcattttccatcc                                      |

**Supplementary table S2. Plasmids used in this study**

| Plasmid name | Plasmid contents                                                                                               | Parental plasmid | Oligos used                  | Made in this study? |
|--------------|----------------------------------------------------------------------------------------------------------------|------------------|------------------------------|---------------------|
| pE194        | pTarget backbone                                                                                               |                  |                              | No <sup>1</sup>     |
| pG0420       | pG0400 with promoter                                                                                           | pG0400           |                              | Yes                 |
| pGG25        | pCRISPR with <i>spc1</i> spacer only                                                                           | pWJ30β           | GG12+GG58                    | Yes                 |
| pGG-Bsal-R   | pCRISPR with no spacer                                                                                         |                  |                              | No <sup>2</sup>     |
| pJTR109      | pCRISPR with gp43 spacer, dHD                                                                                  | pWJ191, pJTR119  | (W852+GG425)+(W614+GG424)    | Yes                 |
| pJTR111      | pCRISPR with <i>spc1</i> spacer, dCsm6                                                                         | pGG25, pWJ241    | (W852+GG425)+(W614+GG424)    | Yes                 |
| pJTR121      | pCRISPR with gp43 spacer, dHD, dPalm                                                                           | pWJ191, pJTR120  | (W852+GG425)+(W614+GG424)    | Yes                 |
| pJTR125      | pCRISPR with gp43 spacer, dHD, dCsm6                                                                           | pWJ191, pJTR124  | (W852+GG425)+(W614+GG424)    | Yes                 |
| pJTR135      | pCRISPR with <i>spc1</i> -flip spacer                                                                          | pGG-Bsal-R       | JTR405+JTR406 (Bsal cloning) | Yes                 |
| pJTR138      | pCRISPR with <i>spc1</i> -flip spacer, dCsm6                                                                   | pJTR135, pWJ241  | (W852+GG425)+(W614+GG424)    | Yes                 |
| pJTR162      | pTarget                                                                                                        | pJTR77           |                              | Yes                 |
| pJTR175      | pCRISPR with <i>spc1</i> spacer, dHD                                                                           | pGG25, pJTR109   | (W852+GG425)+(W614+GG424)    | Yes                 |
| pJTR177      | pCRISPR with <i>spc1</i> spacer, dHD, dCsm6                                                                    | pGG25, pJTR125   | (W852+GG425)+(W614+GG424)    | Yes                 |
| pJTR193      | Genome editing plasmid, with spacer targeting homology arm of pG0400, and homology arms with a promoter inside | pJTR173, pJTR190 |                              | Yes                 |
| pJTR240      | pCRISPR with <i>spc1</i> spacer, dCsm3, dCsm6                                                                  | pJTR111          | (PS465+W614)+(PS466+W852)    | Yes                 |
| pJTR241      | pCRISPR with <i>spc1</i> -flip spacer, dCsm3, dCsm6                                                            | pJTR138          | (PS465+W614)+(PS466+W852)    | Yes                 |
| pWJ191       | pCRISPR with gp43 spacer                                                                                       |                  |                              | No <sup>3</sup>     |
| pWJ241       | pCRISPR with gp43 spacer, dCsm6                                                                                |                  |                              | No <sup>3</sup>     |

**Supplementary table S3. Cloning strategies for plasmids used in this study**

| <b>Name</b> | <b>Sequence</b>                                                                                                                                                                                                                                                                                                                                                                                                                                                     |
|-------------|---------------------------------------------------------------------------------------------------------------------------------------------------------------------------------------------------------------------------------------------------------------------------------------------------------------------------------------------------------------------------------------------------------------------------------------------------------------------|
| pG0420      | Homology-directed allelic exchange with Cas9 elimination was performed as described in reference <sup>4</sup> . Briefly, a plasmid (pJTR193) with the promoter to be inserted between 1 kb homology arms was transformed into pG0400-containing <i>S. aureus</i> RN4220 cells. This plasmid also contained Cas9 with a spacer targeting the unedited pG0400 template. Subsequently, pJTR193 was cured by growing the cells at the non-permissive temperature (37°C) |
| pGG25       | PCR amplification of pWJ30 $\beta$ with GG12/GG58, followed by a Gibson assembly of the PCR product                                                                                                                                                                                                                                                                                                                                                                 |
| pJTR109     | PCR amplification of pWJ191 with W852/GG425, and pJTR119 with W614/GG424, followed by a Gibson assembly of the two products                                                                                                                                                                                                                                                                                                                                         |
| pJTR111     | PCR amplification of pGG25 with W852/GG425, and pWJ241 with W614/GG424, followed by a Gibson assembly of the two products                                                                                                                                                                                                                                                                                                                                           |
| pJTR121     | PCR amplification of pWJ191 with W852/GG425, and pJTR120 with W614/GG424, followed by a Gibson assembly of the two products                                                                                                                                                                                                                                                                                                                                         |
| pJTR125     | PCR amplification of pWJ191 with W852/GG425, and pJTR124 with W614/GG424, followed by a Gibson assembly of the two products                                                                                                                                                                                                                                                                                                                                         |
| pJTR135     | Bsal-HF (NEB) digestion of plasmid pGG-Bsal-R, followed by ligation with annealed oligos JTR405 and JTR406 with compatible overhangs                                                                                                                                                                                                                                                                                                                                |
| pJTR138     | PCR amplification of pJTR135 with W852/GG425, and pWJ241 with W614/GG424, followed by a Gibson assembly of the two products                                                                                                                                                                                                                                                                                                                                         |
| pJTR162     | Digestion of pJTR77 with with KpnI-HF and MfeI-HF, and ligation with chromosomal fragment from <i>S. aureus</i>                                                                                                                                                                                                                                                                                                                                                     |
| pJTR175     | PCR amplification of pGG25 with W852/GG425, and pJTR109 with W614/GG424, followed by a Gibson assembly of the two products                                                                                                                                                                                                                                                                                                                                          |
| pJTR177     | PCR amplification of pGG25 with W852/GG425, and pJTR25 with W614/GG424, followed by a Gibson assembly of the two products                                                                                                                                                                                                                                                                                                                                           |
| pJTR193     | PCR amplification of pJTR173 with AV552/W614 and AV553/W852, and pJTR190 with JTR530/JTR531, followed by a Gibson assembly of the three products                                                                                                                                                                                                                                                                                                                    |
| pJTR240     | PCR amplification of pJTR111 with PS465/W614, and with PS466/W852, followed by a Gibson assembly of the two products                                                                                                                                                                                                                                                                                                                                                |
| pJTR241     | PCR amplification of pJTR138 with PS465/W614, and with PS466/W852, followed by a Gibson assembly of the two products                                                                                                                                                                                                                                                                                                                                                |

### Supplementary references.

- 1 Horinouchi, S. & Weisblum, B. Nucleotide sequence and functional map of pE194, a plasmid that specifies inducible resistance to macrolide, lincosamide, and streptogramin type B antibiotics. *J. Bacteriol.* **150**, 804-814 (1982).
- 2 Goldberg, G. W., Jiang, W., Bikard, D. & Marraffini, L. A. Conditional tolerance of temperate phages via transcription-dependent CRISPR-Cas targeting. *Nature* **514**, 633-637 (2014).
- 3 Jiang, W., Samai, P. & Marraffini, L. A. Degradation of phage transcripts by CRISPR-associated RNases enables type III CRISPR-Cas immunity. *Cell* **164**, 710-721 (2016).
- 4 Chen, W., Zhang, Y., Yeo, W. S., Bae, T. & Ji, Q. Rapid and Efficient Genome Editing in *Staphylococcus aureus* by Using an Engineered CRISPR/Cas9 System. *J. Am. Chem. Soc.* **139**, 3790-3795 (2017).
